# Supplementary material
Source: Royal Society of Chemistry journal article supplement (doi:10.1039/d6ay00343e)
Supplement: d6ay00343e1.pdf [file d6ay00343e1.pdf]

## Supporting Information

### A Centrifugal Microfluidic Chip with Integrated Solid-Phase Extraction for Separation and Detection of Cd<sup>2+</sup> and Cu<sup>2+</sup>

Lei Luo<sup>1</sup>, Yuhang Lian<sup>1</sup>, RuiRui Zhu<sup>2</sup>, Shuai Yuan<sup>3</sup>, Mingyong Zhou<sup>1,2,\*</sup>

<sup>1</sup> College of Mechanical and Electrical Engineering & State Key Laboratory of Precision Manufacturing for Extreme Service Performance, Central South University, Changsha 410083, China

<sup>2</sup> Key Laboratory of Monitoring for Heavy Metal Pollutants, Ministry of Ecology and Environment, Changsha 410019, China

<sup>3</sup> School of Health and Life Sciences, University of Health and Rehabilitation Sciences, Qingdao 266113, China

\* Corresponding author: Mingyong Zhou; Email: mingyong.zhou1989@csu.edu.cn

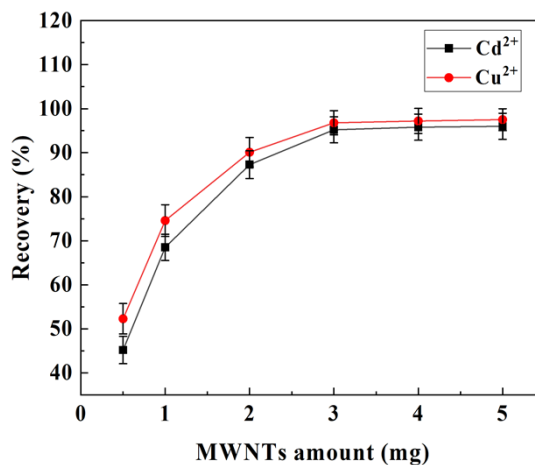

**Figure S1.** Effect of MWNTs amount on the adsorption efficiency of Cd<sup>2+</sup> and Cu<sup>2+</sup>. Conditions: initial metal ion concentration 1.0 mg/L, pH 6.95, AC concentration 1.0 mmol/L, shaking time 30 min. Data are presented as mean ± SD (n = 3).

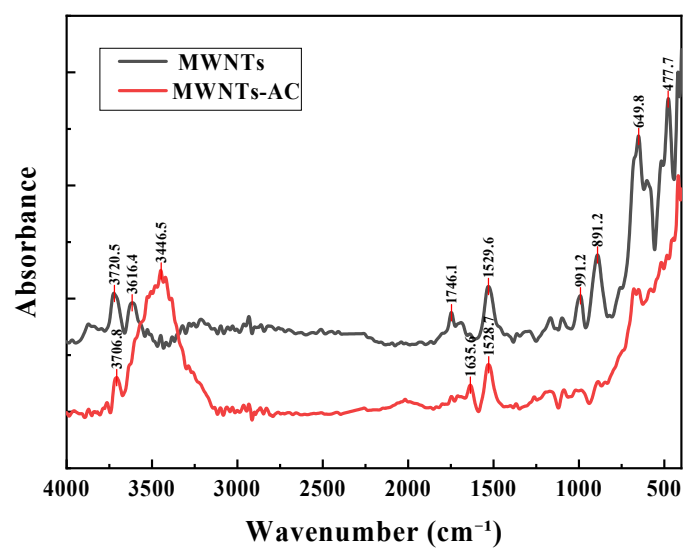

**Figure S2.** FT-IR spectra of pristine MWNTs and MWNTs after adsorption of alizarin complexone (AC). The AC-adsorbed MWNTs show characteristic AC peaks: O–H stretching at  $\sim 3446\text{ cm}^{-1}$ , aromatic C=C at  $\sim 1636\text{ cm}^{-1}$ , and a weakened carboxyl C=O peak at  $\sim 1746\text{ cm}^{-1}$ , indicating successful loading of AC onto MWNTs via non-covalent interactions.
